# Supplementary material for: Enhanced photocatalytic performance of a stable type–II PtSe2/GaSe van der Waals heterostructure
Source: Royal Society of Chemistry journal article supplement (doi:10.1039/d3cp01338c), 2023-01-01
Supplement: d3cp01338c1.pdf [file d3cp01338c1.pdf]

## Supplementary Material

### Enhanced Photocatalytic Performance of Stable Type –II PtSe<sub>2</sub>/GaSe Van der Waals Heterostructure

P. R. Parmar,<sup>a</sup> S. J. Khengar,<sup>a</sup> Yogesh Sonvane\*<sup>b</sup> and P. B. Thakor<sup>a</sup>

a.Department of Physics, Veer Narmad South Gujarat University, Surat 395007, India

Email: pbthakor@rediffmail.com

b.Advance Material Lab, Department of Physics, Sardar Vallabhbhai National Institute of Technology, Surat 395007, India. Email: [yas@phy.svnit.ac.in](mailto:yas@phy.svnit.ac.in)

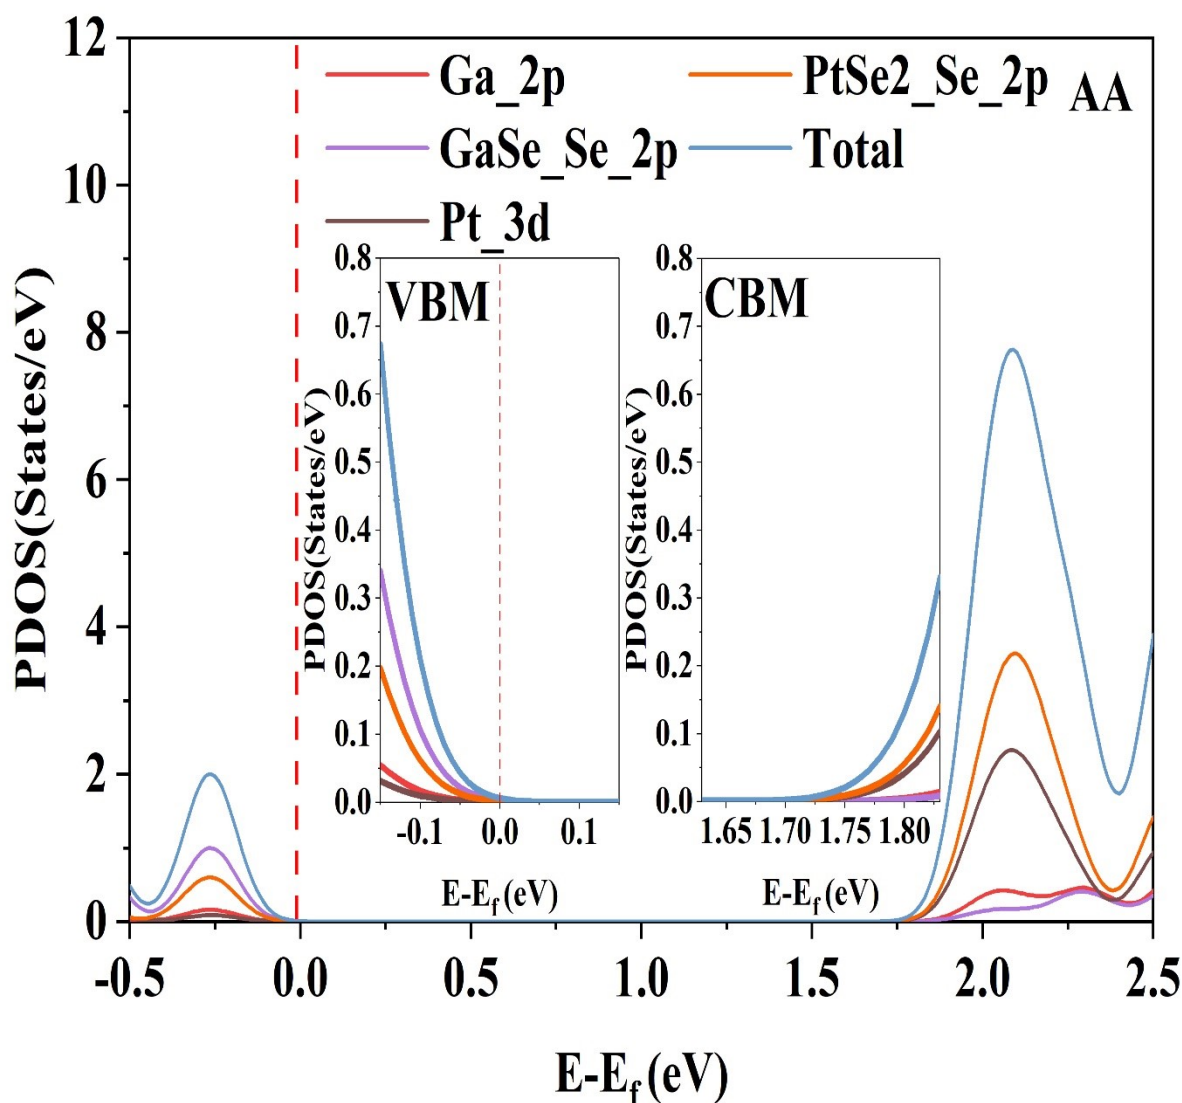

Fig. S1. Enlarged view of VBM and CBM of PDOS of vdWHS-AA

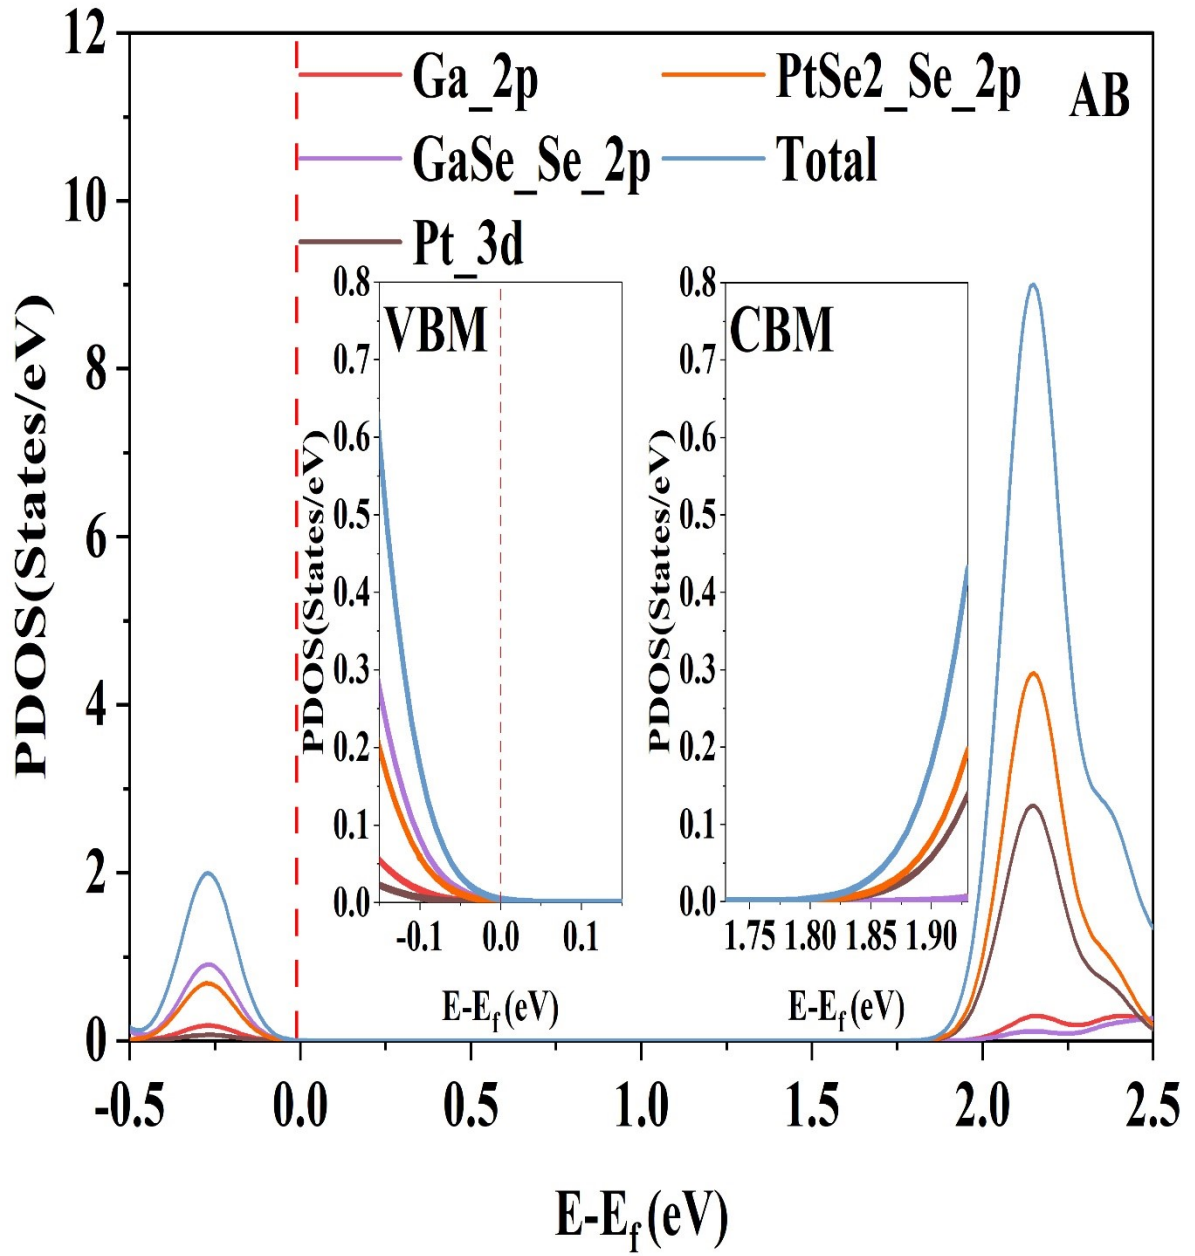

Fig. S2. Enlarged view of VBM and CBM of PDOS of vdwHS-AB

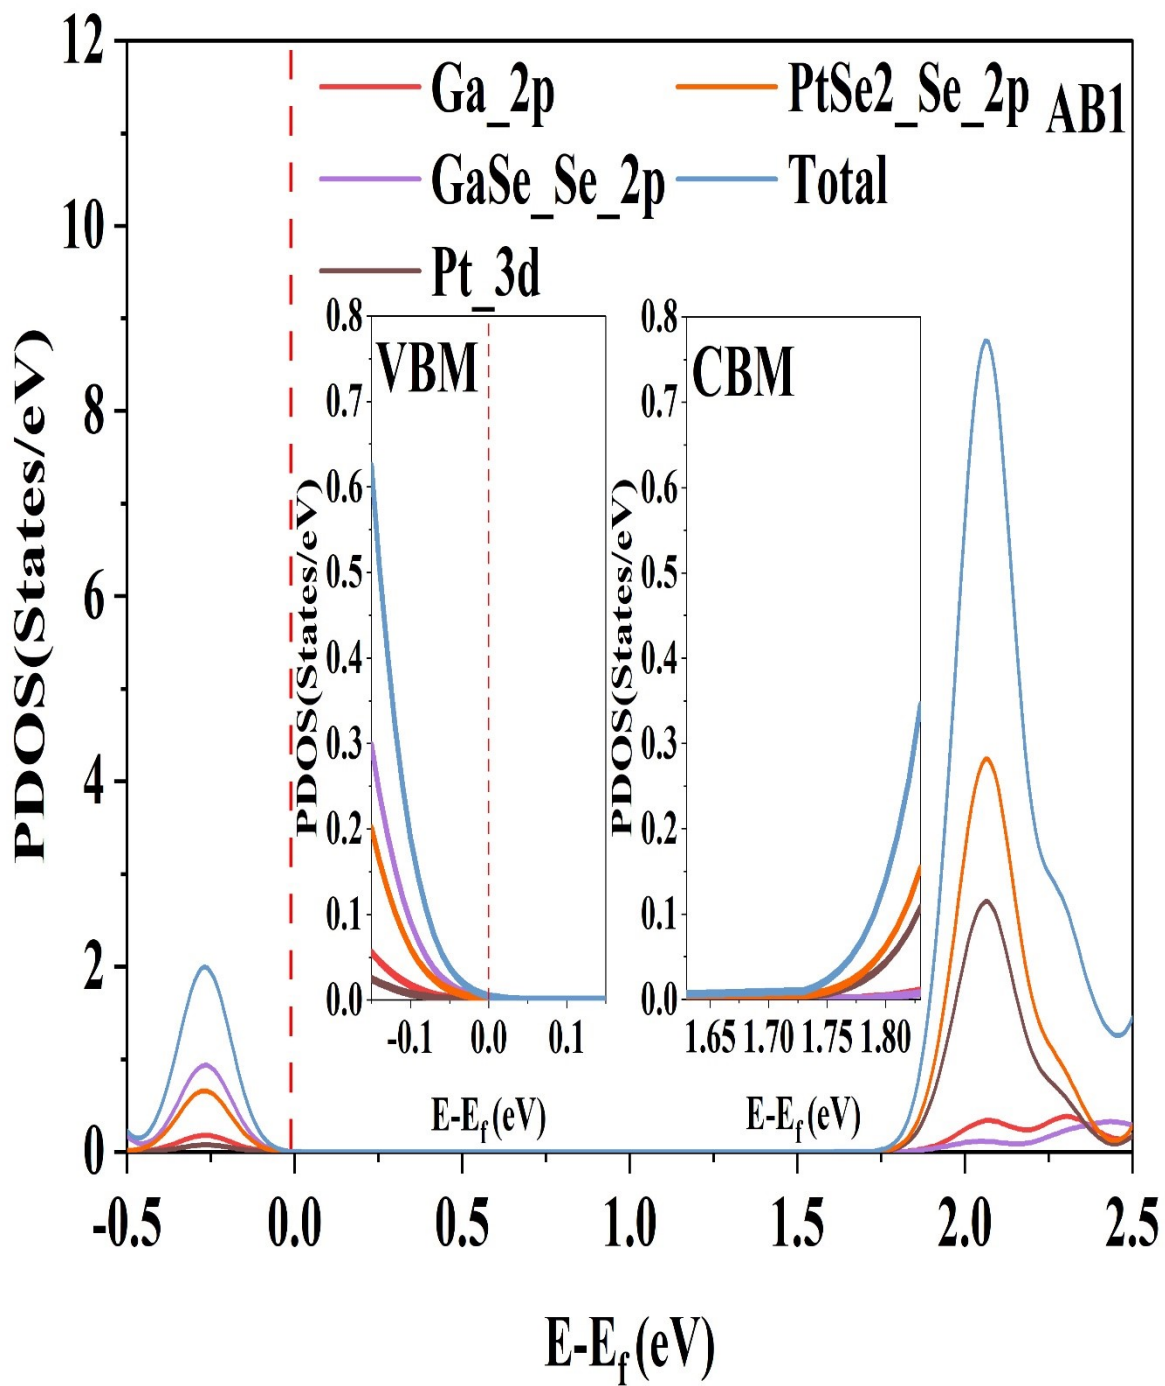

Fig. S3. Enlarged view of VBM and CBM of PDOS of vdWHS-AB1
